# Supplementary material for: Characterizing emerging companies in computational drug development
Source: Springer Nature journal article supplement (doi:10.1038/s43588-024-00594-8), 2024-02-26
Supplement: 43588_2024_594_MOESM1_ESM.pdf [file 43588_2024_594_MOESM1_ESM.pdf]

# Characterizing emerging companies in computational drug development

---

In the format provided by the authors and unedited

## Supplementary Tables

**Supplementary Table 1: Company selection criteria.** Ordered list of criteria used to curate a dataset of emerging computational drug development companies for analysis.

| Criteria # | Description                                                                                                                                                                       |
|------------|-----------------------------------------------------------------------------------------------------------------------------------------------------------------------------------|
| 1          | Computational techniques should be a major aspiration / ethos of the company, with the biopharma industry as core focus.                                                          |
| 2          | Small to medium market capitalization (market capitalization below 10 billion)                                                                                                    |
| 3          | Has received more than \$25 million in private funding or is a public company.                                                                                                    |
| 4          | The company has a dataset, tool, or product that can directly support any part of the drug development process.                                                                   |
| 5          | Companies focused only on diagnosis, life science tools, wearables, devices, or lab automation are excluded, unless they aim to support drug development as a business component. |
| 6          | We distinguish between companies with a drug pipeline (partnered or proprietary) versus companies operating as service providers, see Figure 1.                                   |

**Supplementary Table 2: Drug R&D and computational dimensions.** Definitions used to classify computational drug R&D companies by drug R&D focus and computational advantage.

| Dimension                            | Description                                                                                                                                                                                                     |
|--------------------------------------|-----------------------------------------------------------------------------------------------------------------------------------------------------------------------------------------------------------------|
| <b>Drug R&amp;D Axis</b>             |                                                                                                                                                                                                                 |
| Therapeutic modality design          | Design, selection, and optimization of the drug candidate. The modality can be a small molecule, antibody, gene editing, etc. Docking and protein structural information also falls into this category.         |
| Biological insight                   | Functional validation of the relationship between a disease and a biological target. This includes phenotypic characterization of a living system, understanding of signaling pathways, and roles of mutations. |
| Tissue & delivery                    | Ability to target the tissue or cell type of interest, including formulation delivery mechanism, such as nano-particle or viral vector.                                                                         |
| Toxicology and safety                | Safety in animal model and human, ADMET, hERG interaction, and carcinogenesis.                                                                                                                                  |
| Clinical trial and patient profiling | Clinical trial design, synthetic arms, biomarkers for patient selection, diagnosis, and personalized treatment.                                                                                                 |
| Commercialization & regulatory       | Market access and reimbursement, pricing, post-market monitoring, advertisement, and sales.                                                                                                                     |
| <b>Computational Axis</b>            |                                                                                                                                                                                                                 |
| Computing hardware advantage         | Exceptional hardware to be differentiated, cloud computing democratized access to big computing power.                                                                                                          |
| Dataset advantage                    | Proprietary dataset, unique collection about a biomedical topic, not publicly available. Dataset should be difficult to replicate by competitors.                                                               |
| Algorithm & analytics advantage      | Unique software developed by the company, or special techniques to mine datasets, generate insights, or make predictions.                                                                                       |

**Supplementary Table 3: Deal types.** Descriptions of types of deals completed by computational drug R&D companies and partners, with larger theme of deal indicated.

| Deal type                                     | Description                                                                                                                                                                                                                                                                                                 |
|-----------------------------------------------|-------------------------------------------------------------------------------------------------------------------------------------------------------------------------------------------------------------------------------------------------------------------------------------------------------------|
| Drug – CRADA                                  | Principal and Partner (US federal agency) establish a Cooperative Research and Development Agreement (CRADA).                                                                                                                                                                                               |
| Drug – Funding                                | Principal receives (or receives commitment) from Partner for funding to direct to development of drug(s). This type of agreement usually occurs between a pharma or biotech company and a charity, a non-profit organization, or a government agency. The Principal company is the one receiving the funds. |
| Drug – Asset Divestment                       | Principal sells to Partner assets associated with drug(s).                                                                                                                                                                                                                                                  |
| Drug – Discovery/Design                       | Principal and Partner agree to jointly or individually discover and design a drug candidate(s), with a business strategy to develop the drug(s) further.                                                                                                                                                    |
| Drug – Screening/Evaluation                   | Principal agrees to screen or evaluate a drug candidate(s) against potential targets or in a particular model for Partner.                                                                                                                                                                                  |
| Drug – Early Research/Development             | Principal and Partner form an alliance to jointly use expertise/resources to develop drug candidates.                                                                                                                                                                                                       |
| Drug – Development/ Commercialization License | Partner acquires a license from Principal to develop and commercialize (sell) drug(s).                                                                                                                                                                                                                      |
| Drug – Commercialization License              | Partner acquires a license from Principal to market drug(s) OR Principal agrees to promote drug(s) in collaboration with Partner.                                                                                                                                                                           |
| Drug – Manufacturing/Supply                   | Principal agrees to manufacture or supply drug(s) for Partner.                                                                                                                                                                                                                                              |
| Drug – Development Services                   | Principal agrees to perform drug development services for Partner.                                                                                                                                                                                                                                          |
| Drug – Authorized Generic                     | Partner acquires a license from Principal to sell a repackaged version of brand drug as authorized generic.                                                                                                                                                                                                 |
| Technology – Asset Divestment                 | Principal sells to Partner assets associated with technology (or technologies).                                                                                                                                                                                                                             |
| Technology – Delivery/Formulation             | Partner acquires a license to use Principal's delivery/formulation technology with drug(s) OR Principal agrees to work with Partner to formulate drug(s).                                                                                                                                                   |
| Technology – Target Validation                | Partner acquires a license to use Principal's technology to validate or verify a target, which a developed drug would be directed against.                                                                                                                                                                  |
| Technology – Other Proprietary                | Partner acquires a license to use Principal's technology with drug(s) OR Principal agrees to use its technology with Partner's drug.                                                                                                                                                                        |
| Patent – Asset Divestment                     | Principal sells to Partner patent rights.                                                                                                                                                                                                                                                                   |
| Patent – Exclusive Rights                     | Partner acquires an exclusive license to use patent(s) belonging to Principal. Exclusive means that no other company has (or will have) the same rights to the patent(s).                                                                                                                                   |
| Patent – Non-Exclusive Rights                 | Partner acquires a non-exclusive license to use patent(s) belonging to Principal. Non-exclusive means that the Principal retains rights to license the same rights to other companies.                                                                                                                      |
| Patent – Litigation Settlement                | Principal resolves patent litigation with Partner. Principal may grant Partner a license to begin marketing its own generic version of brand drug on a specified date.                                                                                                                                      |
| Company – Joint Venture                       | Principal and Partner establish a joint venture company/branch.                                                                                                                                                                                                                                             |
| Company – M&A (in whole or part)              | All Partner operating units, assets, and liabilities are transferred to Principal.                                                                                                                                                                                                                          |

## Supplementary Figures

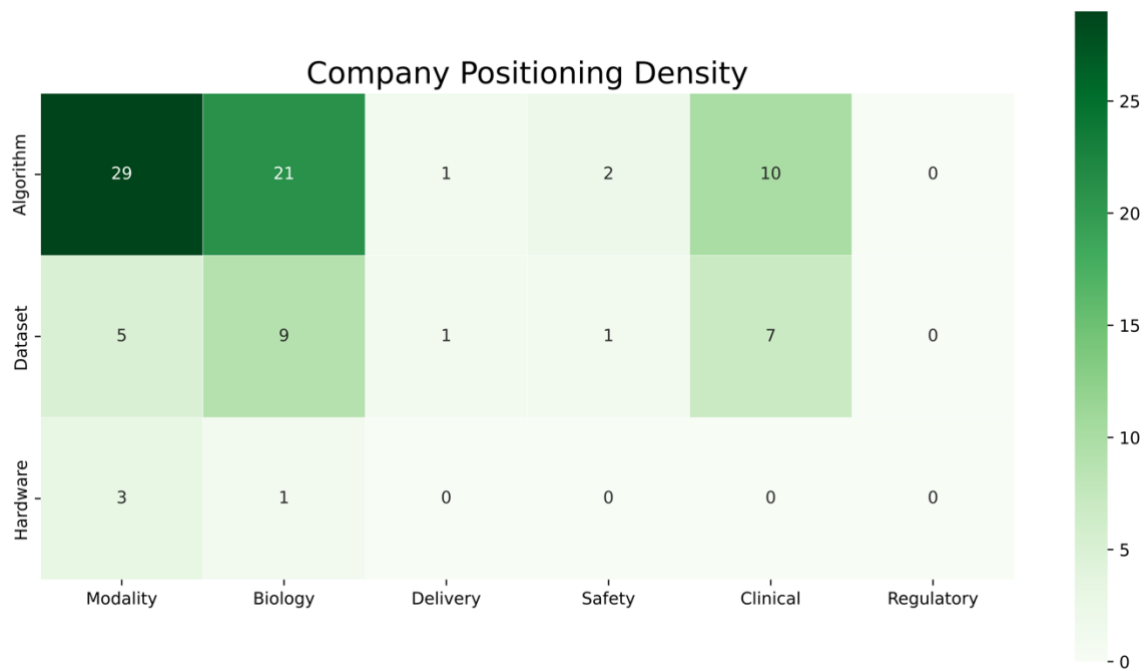

**Supplementary Figure 1: Company positioning based on drug R&D focus and computational capabilities.** The cell value reflects the number of companies with indicated profile. A company can be present in more than one cell.

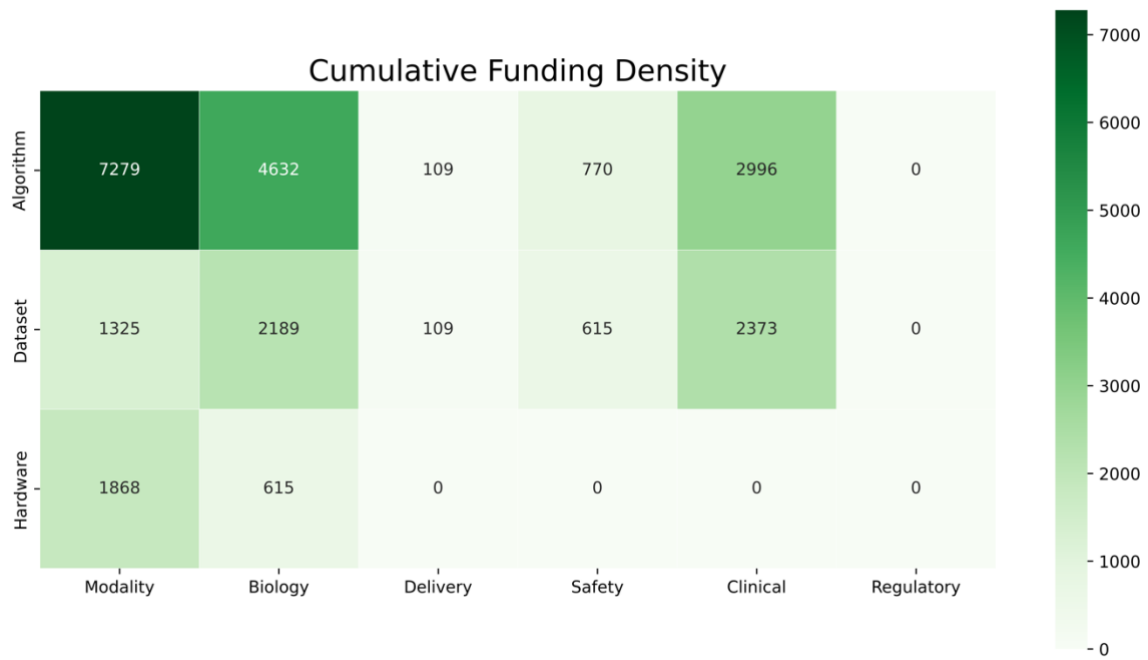

**Supplementary Figure 2: Heatmap of cumulative funding raised by companies in each sector.** If a company appears in multiple cells, the total amount raised will be used for all cells.

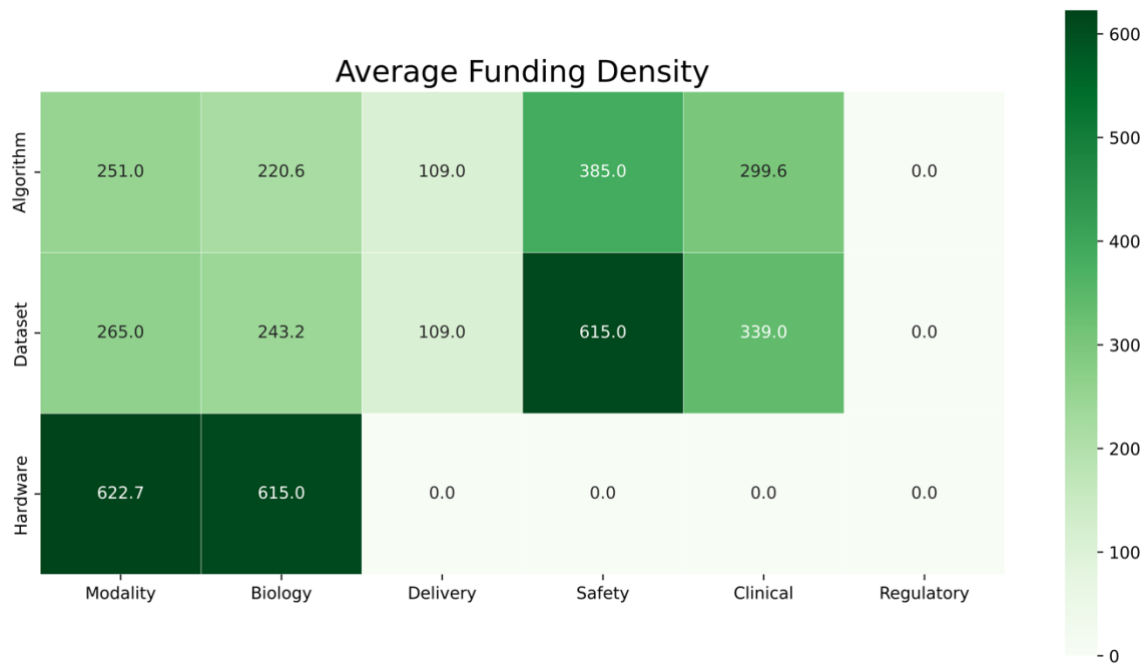

**Supplementary Figure 3: Heatmap of average funding raised per company in each sector.**  
 If a company appears in multiple cells, the total amount raised will be used for all cells.

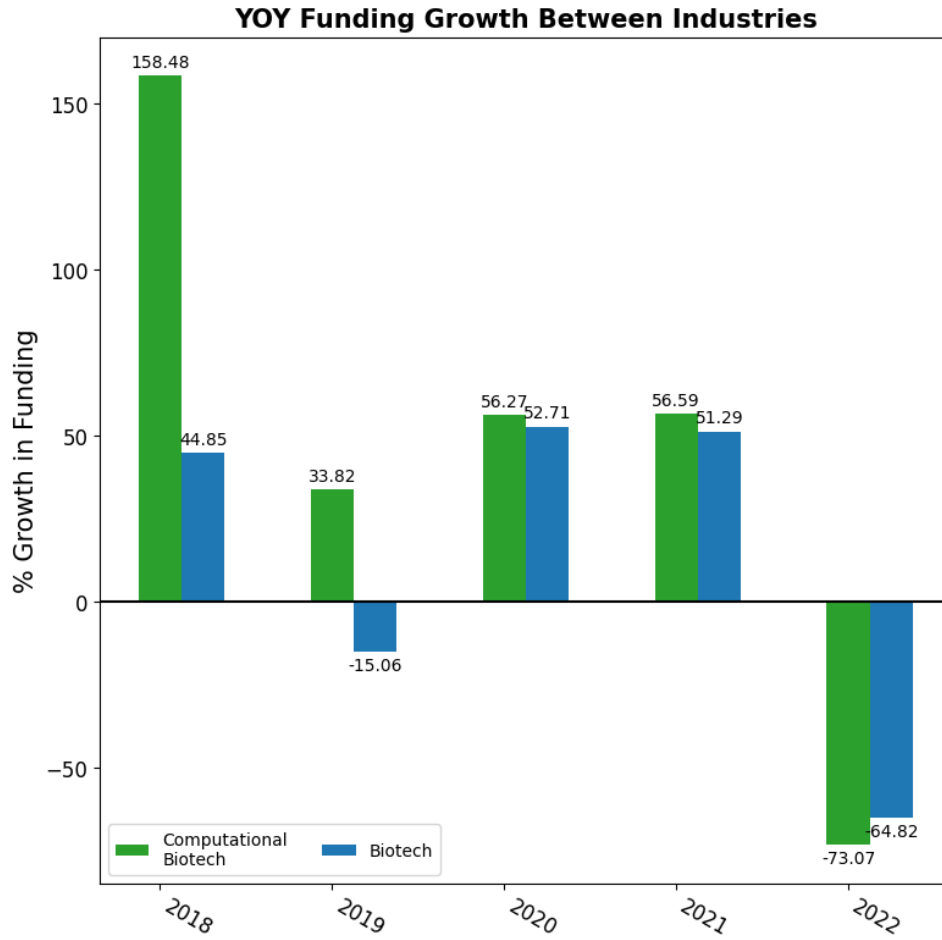

**Supplementary Figure 4: Recent funding growth comparison of overall biotech industry and subset of computational drug R&D companies.** Funding growth represented as percent growth year over year.
